# Supplementary material
Source: PubMed Central journal article supplement (PMC3104101)
Supplement: NIHMS288191-supplement-3.pdf [file NIHMS288191-supplement-3.pdf]

| Supplementary File     | Title                                                                                                                                                                                                                                                                                                                                                                                                                                                                                                                                                                                                                                                                                                                                                                                                                                                                                                  |
|------------------------|--------------------------------------------------------------------------------------------------------------------------------------------------------------------------------------------------------------------------------------------------------------------------------------------------------------------------------------------------------------------------------------------------------------------------------------------------------------------------------------------------------------------------------------------------------------------------------------------------------------------------------------------------------------------------------------------------------------------------------------------------------------------------------------------------------------------------------------------------------------------------------------------------------|
| Supplementary Figure 1 | Correlation between the automatically and manually generated alignment quality scores $Q_i$ and $Q_v$ of 805 alignments. The central brain, left and right optic lobes were scored separately to best assess the consistency of the two alignment quality scores in different brain areas.                                                                                                                                                                                                                                                                                                                                                                                                                                                                                                                                                                                                             |
| Supplementary Figure 2 | Choosing the target brain. 295 images were aligned to an initial target brain $T_R$ . The mean image of all aligned brains, $T_A$ , was chosen as the new target brain. Initially all brains had different orientations and sizes, and thus overlapping them did not yield a meaningful pattern. Through the global alignment these brains were transformed to have the same center of mass, similar orientations and sizes. However, overlapping them did not yet produce a bright consensus and sharp border in the average brain. Once the local alignment was performed, we obtained an average brain ( $T_A$ ) that was much brighter and less fuzzy than that of the globally registered brains. The correlation (= 0.940) between $T_A$ and $T_R$ was substantially higher than that (= 0.467) between the mean of the globally aligned brains and $T_R$ , because of the good local alignment. |
| Supplementary Figure 3 | Improvement of alignment of 496 brain images by replacing $T_R$ using $T_A$ .                                                                                                                                                                                                                                                                                                                                                                                                                                                                                                                                                                                                                                                                                                                                                                                                                          |
| Supplementary Figure 4 | Comparison of computational and biological methods to determine expression pattern overlap of the aligned and co-expressed patterns of <i>a156-GAL4; UAS-mCD8-GFP</i> and <i>LexAP078; lexAop-CD2-GFP</i> . Yellow arrows, the most overlapping regions.                                                                                                                                                                                                                                                                                                                                                                                                                                                                                                                                                                                                                                               |
| Supplementary Figure 5 | Comparison of obligate subsets with parent expression patterns. (a) Original GAL4 pattern (magenta) of <i>CG8916_1-3-X-GAL4; UAS-mCD8-GFP</i> . (b-c) Two example Flp-Out clones (yellow and green) of this GAL4 line. Red arrows and $P_1, P_2, P_3$ : three obligate subset-patterns. (d) Aligned original pattern and obligate Flp-Out subsets show substantial overlap. $F$ : the parent pattern. CC: the regional correlation coefficients of patterns $P_1, P_2$ , and $P_3$ and the parent pattern. All $p$ -values of calculated correlation statistics are less than $10^{-5}$ . $P_S$ : a location for zoom-in inspection. (e) Cross-sectional view the region around $P_S$ in (d) shows co-localization of the obligate subset and the parent GAL4 pattern.                                                                                                                                 |
| Supplementary Figure 6 | Analysis of a 3D neuronal expression pattern atlas of a large collection of aligned GAL4 lines. (a) Distribution of                                                                                                                                                                                                                                                                                                                                                                                                                                                                                                                                                                                                                                                                                                                                                                                    |

|                               |                                                                                                                                                                                                                                                                                                                                                                                                                                                                                       |
|-------------------------------|---------------------------------------------------------------------------------------------------------------------------------------------------------------------------------------------------------------------------------------------------------------------------------------------------------------------------------------------------------------------------------------------------------------------------------------------------------------------------------------|
|                               | GAL4 expressions in different brain compartments. The volume percentages of compartments in the target brain are shown in the brackets following the compartment names. <b>(b)</b> Compartment-volume normalized distribution of GAL4 expressions. The statistic was rescaled to have a range of [0, 1], for better visualization. <b>(c)</b> The volume of different compartments in our target brain. In the bracket the number of image voxels in a compartment is also displayed. |
| <b>Supplementary Note</b>     | Comparison of several different aligners on LSM images of <i>Drosophila</i> brains                                                                                                                                                                                                                                                                                                                                                                                                    |
| <b>Supplementary Video 1</b>  | Aligned and overlaid neuronal patterns of <i>a64-GAL4</i> and <i>a74-GAL4</i> . Magenta, <i>a64-GAL4</i> ; green, <i>a74-GAL4</i> .                                                                                                                                                                                                                                                                                                                                                   |
| <b>Supplementary Video 2</b>  | Six aligned and overlaid GAL4 patterns in Fig. 1d. Color schema: see Fig. 1d.                                                                                                                                                                                                                                                                                                                                                                                                         |
| <b>Supplementary Video 3</b>  | 3D reconstructed neurite tracts from 20 aligned <i>a278-GAL4</i> images, along with their mean tract model (red).                                                                                                                                                                                                                                                                                                                                                                     |
| <b>Supplementary Video 4a</b> | The aligned patterns of <i>a156-GAL4</i> ; <i>UAS-mCD8-GFP</i> and <i>LexAP078</i> ; <i>lexAop-mCD2-GFP</i> . Magenta, <i>a156-GAL4</i> ; green, <i>LexAP078</i> .                                                                                                                                                                                                                                                                                                                    |
| <b>Supplementary Video 4b</b> | The co-expressed patterns of <i>a156-GAL4</i> ; <i>UAS-mCD8-GFP</i> and <i>LexAP078</i> ; <i>lexAop-mCD2-GFP</i> . Magenta, <i>a156-GAL4</i> ; green, <i>LexAP078</i> .                                                                                                                                                                                                                                                                                                               |
| <b>Supplementary Video 5</b>  | Aligned and overlaid patterns of <i>CG8916_1-3-X-GAL4</i> along with its two Flp-Out segments. Magenta, the original pattern; yellow and green, the Flp-Out patterns.                                                                                                                                                                                                                                                                                                                 |
| <b>Supplementary Video 6a</b> | Maximal intensity project view of six aligned GAL4 patterns in the central complex. Color schema: see Fig. 1d.                                                                                                                                                                                                                                                                                                                                                                        |
| <b>Supplementary Video 6b</b> | Cross-sectional view of six aligned GAL4 patterns in the central complex. Color schema: see Fig. 1d.                                                                                                                                                                                                                                                                                                                                                                                  |
| <b>Supplementary Video 7</b>  | A database of 269 stereotyped neurite tracts throughout the <i>Drosophila</i> brain. The width of each tract equals the respective spatial deviation. The tracts are color-coded randomly for better visualization.                                                                                                                                                                                                                                                                   |
